# Supplementary material
Source: ML conference proceedings conference paper supplement (https://openaccess.thecvf.com/content/CVPR2026/html/Ye_Conditional_Factuality_Controlled_CVPR_2026_paper.html)
Supplement: Supplementary file 1 [file Ye_Conditional_Factuality_Controlled_CVPR_2026_supplemental.pdf]

## A. Extended Background

### A.1. Conformal Factuality

Let  $X \in \mathcal{X}$  be a prompt and let  $\pi : \mathcal{X} \rightarrow \Delta(\mathcal{Y})$  denote a fixed generator over completions. At inference time, we repeatedly draw candidates  $Y \sim \pi(\cdot | X)$  and seek a prediction set that contains *at least one correct answer* with high probability:

$$\mathbb{P}\left(\exists y \in \widehat{C}_\alpha(X_{N+1}) : A(X_{N+1}, y) = 1\right) \geq 1 - \alpha, \quad (\text{A.1})$$

where  $\alpha$  is the target error level and  $A(X, y) \in \{0, 1\}$  indicates whether candidate  $y$  is correct for prompt  $X$ . To achieve this guarantee, each sampled candidate is evaluated with a verifier score  $V : \mathcal{X} \times \mathcal{Y} \rightarrow [0, 1]$ . In this paper, smaller verifier scores are better, so a calibrated acceptance rule amounts to choosing a threshold and retaining all candidates with score below it.

### A.2. Inductive Conformal Prediction

Split conformal prediction transforms the outputs of a black-box model into valid prediction sets using a held-out calibration set [17, 20]. Given calibration pairs  $\{(X_i, Y_i)\}_{i=1}^N$  and a nonconformity score function  $s : \mathcal{X} \times \mathcal{Y} \rightarrow \mathbb{R}$ , one computes calibration scores  $V_i = s(X_i, Y_i)$ , sorts them, and forms the empirical quantile

$$\widehat{Q}_{1-\alpha} := V_{(\lceil (N+1)(1-\alpha) \rceil)}. \quad (\text{A.2})$$

The corresponding split-conformal prediction set is

$$\widehat{C}_{1-\alpha}(X_{N+1}) := \{y \in \mathcal{Y} : s(X_{N+1}, y) \leq \widehat{Q}_{1-\alpha}\}, \quad (\text{A.3})$$

which satisfies marginal coverage

$$\mathbb{P}\left(Y_{N+1} \in \widehat{C}_{1-\alpha}(X_{N+1})\right) \geq 1 - \alpha \quad (\text{A.4})$$

under exchangeability. In the conformal-factuality setting, this corresponds to using one global acceptance threshold for all prompts.

### A.3. Conditional Conformal Prediction

Marginal coverage holds only on average over the prompt distribution. For LLMs, this can hide severe heterogeneity: easy prompts may be over-covered while hard prompts are under-covered. The ideal pointwise conditional guarantee

$$\mathbb{P}\left(Y_{N+1} \in \widehat{C}(X_{N+1}) \mid X_{N+1} = x\right) \geq 1 - \alpha \quad (\text{A.5})$$

is impossible to achieve exactly in finite samples without strong assumptions [6, 19].

Following Gibbs et al. [7], one can rewrite exact conditional coverage as an infinite family of weighted marginal constraints:

$$\mathbb{P}\left(Y_{N+1} \in \widehat{C}(X_{N+1}) \mid X_{N+1}\right) = 1 - \alpha \iff \mathbb{E}\left[f(X_{N+1})(\mathbb{1}\{Y_{N+1} \in \widehat{C}(X_{N+1})\} - (1 - \alpha))\right] = 0 \quad (\text{A.6})$$

for all measurable  $f$ . Their relaxation replaces the class of all measurable functions with a chosen function class  $\mathcal{F}$ :

$$\mathbb{E}\left[f(X_{N+1})(\mathbb{1}\{Y_{N+1} \in \widehat{C}(X_{N+1})\} - (1 - \alpha))\right] = 0, \quad \text{for all } f \in \mathcal{F}. \quad (\text{A.7})$$

Taking  $\mathcal{F} = \{1\}$  recovers marginal conformal prediction, while  $\mathcal{F} = \{\Phi(\cdot)^\top \beta : \beta \in \mathbb{R}^d\}$  yields a finite-dimensional feature-conditional target.

For this linear class, Gibbs et al. define an augmented quantile-regression estimator using the pinball loss

$$\rho_{1-\alpha}(u) = u((1 - \alpha) - \mathbb{1}\{u < 0\}). \quad (\text{A.8})$$

Given calibration scores  $\{(X_i, S_i)\}_{i=1}^N$  and a fresh candidate score  $S$ , the augmented fit is

$$\widehat{g}_S := \arg \min_{g \in \mathcal{F}} \frac{1}{N+1} \sum_{i=1}^N \rho_{1-\alpha}(S_i - g(X_i)) + \frac{1}{N+1} \rho_{1-\alpha}(S - g(X_{N+1})). \quad (\text{A.9})$$

The resulting prediction rule keeps labels whose score does not exceed the fitted value at the same score:

$$\widehat{C}(X_{N+1}) := \{y : S(X_{N+1}, y) \leq \widehat{g}_{S(X_{N+1}, y)}(X_{N+1})\}. \quad (\text{A.10})$$

**Theorem A.1** (Gibbs et al. [7], Theorem 2). *Let  $\mathcal{F} = \{\Phi(\cdot)^\top \beta : \beta \in \mathbb{R}^d\}$  be a linear class over the basis  $\Phi : \mathcal{X} \rightarrow \mathbb{R}^d$ . Then for any non-negative  $f \in \mathcal{F}$  with  $\mathbb{E}[f(X)] > 0$ , the prediction rule above satisfies*

$$\mathbb{P}_f\left(Y_{N+1} \in \widehat{C}(X_{N+1})\right) \geq 1 - \alpha. \quad (\text{A.11})$$

Our method is a conformal-factuality instantiation of this framework, with the latent success score  $S(X)$  replacing the standard label-wise nonconformity score and a fixed-point construction used to obtain the deployed threshold.

## B. Proof of Results from the Main Paper

### B.1. Proof of Theorem 4.1

*Proof.* Recall the success score

$$S(X) := \inf\{\lambda \in [0, 1] : \ell_\lambda(X) = 0\} = \inf\{V(X, y) : y \in C(X), A(X, y) = 1\},$$

so that for any threshold  $\lambda(X) \in [0, 1]$ ,

$$\{\exists y \in \widehat{C}_\alpha(X) : A(X, y) = 1\} \iff \{S(X) \leq \lambda(X)\}. \quad (\text{B.1})$$

Thus, if we show that

$$\mathbb{P}_f(S(X_{N+1}) \leq \widehat{\lambda}_\alpha(X_{N+1})) \geq 1 - \alpha \quad (\text{B.2})$$

for every non-negative  $f \in \mathcal{F}$  with  $\mathbb{E}[f(X)] > 0$ , the result follows immediately from (B.1).

Throughout, for any such  $f$  we define the  $f$ -reweighted probability of an event  $E$  by

$$\mathbb{P}_f(E) := \frac{\mathbb{E}[f(X) \mathbb{1}\{(X, S) \in E\}]}{\mathbb{E}[f(X)]}.$$

Let  $\tau := 1 - \alpha$  and recall the pinball loss

$$\rho_\tau(u) = u(\tau - \mathbb{1}\{u < 0\}).$$

Let  $\beta_S$  be the augmented quantile-regression minimizer from Eq. (B.5) for the realized calibration set and the fresh pair  $(X, S)$ , and define  $g(S) := \Phi(X)^\top \beta_S$ . Then for any nonnegative  $f \in \mathcal{F}$  with  $\mathbb{E}[f(X)] > 0$ ,

$$\mathbb{E}[f(X) \mathbb{1}\{S \leq g(S)\}] \geq (1 - \alpha) \mathbb{E}[f(X)].$$

Fix  $\gamma \in \mathbb{R}^d$  with  $f(X) = \Phi(X)^\top \gamma \geq 0$  for all  $X$  and consider

$$\psi_N(\varepsilon) = \frac{1}{N+1} \sum_{i=1}^N \rho_{1-\alpha}(S_i - \Phi(X_i)^\top (\beta_S + \varepsilon\gamma)) + \frac{1}{N+1} \rho_{1-\alpha}(S - \Phi(X)^\top (\beta_S + \varepsilon\gamma)).$$

By convexity and optimality of  $\beta_S$ ,  $\psi'_N(0^+) \geq 0$ . This gives

$$\psi'_N(0^+) = -\frac{1}{N+1} \left[ \sum_{i=1}^N ((1-\alpha) - \mathbb{1}\{S_i \leq \Phi(X_i)^\top \beta_S\}) f(X_i) + ((1-\alpha) - \mathbb{1}\{S \leq \Phi(X)^\top \beta_S\}) f(X) \right] \geq 0.$$

Rearranging,

$$\frac{1}{N+1} \sum_{i=1}^N \mathbb{1}\{S_i \leq \Phi(X_i)^\top \beta_S\} f(X_i) + \frac{1}{N+1} \mathbb{1}\{S \leq \Phi(X)^\top \beta_S\} f(X) \geq (1-\alpha) \frac{1}{N+1} \sum_{i=1}^N f(X_i) + (1-\alpha) \frac{1}{N+1} f(X).$$

Now take expectation over all  $N+1$  exchangeable draws. By exchangeability, each of the  $N+1$  summands on each side has the same distribution, so

$$\mathbb{E}[f(X) \mathbb{1}\{S \leq \Phi(X)^\top \beta_S\}] \geq (1 - \alpha) \mathbb{E}[f(X)].$$

Since  $g(S) = \Phi(X)^\top \beta_S$ , the claim follows.

Recall the CFC threshold

$$\widehat{\lambda}_\alpha(X) := \sup\{t \in [0, 1] : t \leq g(t)\}, \quad g(t) = \Phi(X)^\top \beta_t.$$

By definition of the supremum, for any realized  $S \in [0, 1]$  we have

$$\mathbb{1}\{S \leq g(S)\} \leq \mathbb{1}\{S \leq \widehat{\lambda}_\alpha(X)\}. \quad (\text{B.3})$$

Multiplying (B.3) by  $f(X) \geq 0$  and taking expectations,

$$\mathbb{E}[f(X) \mathbb{1}\{S \leq \widehat{\lambda}_\alpha(X)\}] \geq \mathbb{E}[f(X) \mathbb{1}\{S \leq g(S)\}] \geq (1 - \alpha) \mathbb{E}[f(X)].$$

Dividing by  $\mathbb{E}[f(X)] > 0$  gives

$$\mathbb{P}_f(S \leq \widehat{\lambda}_\alpha(X)) \geq 1 - \alpha.$$

By definition of the success score and the prediction set,

$$\{S(X) \leq \widehat{\lambda}_\alpha(X)\} \iff \{\exists y \in \widehat{C}_\alpha(X) : A(X, y) = 1\}.$$

Therefore,

$$\mathbb{P}_f(\exists y \in \widehat{C}_\alpha(X) : A(X, y) = 1) = \mathbb{P}_f(S(X) \leq \widehat{\lambda}_\alpha(X)) \geq 1 - \alpha,$$

as claimed.  $\square$

## B.2. Proof of Theorem 4.2

*Proof.* Write the calibration set as

$$\mathcal{D}_{\text{cal}} = \{(X_i, S_i)\}_{i=1}^N, \quad (X_{N+1}, S_{N+1}) \sim \text{i.i.d. as } (X_i, S_i),$$

and recall the success indicator

$$Z(x, s) := \mathbb{1}\{s \leq \widehat{\lambda}_\alpha(x)\},$$

so that  $Z(X, S) = 1$  iff there exists a correct candidate in  $\widehat{C}_\alpha(X)$ .

Define

$$Q(\mathcal{D}_{\text{cal}}) := \mathbb{P}(Z(X, S) = 1 \mid \mathcal{D}_{\text{cal}}) = \mathbb{E}[Z(X, S) \mid \mathcal{D}_{\text{cal}}].$$

By Theorem 4.1 applied with  $f \equiv 1$  and the law of total expectation,

$$\mathbb{P}(Z(X, S) = 1) = \mathbb{E}_{\mathcal{D}_{\text{cal}}} Q(\mathcal{D}_{\text{cal}}) \geq 1 - \alpha.$$

Thus

$$\mathbb{E}_{\mathcal{D}_{\text{cal}}} [Q(\mathcal{D}_{\text{cal}})] \geq 1 - \alpha. \quad (\text{B.4})$$

We now show that  $Q(\mathcal{D}_{\text{cal}})$  is Lipschitz in the calibration set, with sensitivity of order  $1/N$  to replacing one calibration pair.

Let  $\mathcal{D} = \{(X_i, S_i)\}_{i=1}^N$  and  $\mathcal{D}' = \{(X'_i, S'_i)\}_{i=1}^N$  differ only in the  $k$ -th pair. For a fixed test prompt  $x$  and a candidate success score  $s \in [0, 1]$ , consider the ridge-regularized augmented quantile regression objective

$$\beta \mapsto \frac{1}{N+1} \sum_{i=1}^N \rho_{1-\alpha}(S_i - \Phi(X_i)^\top \beta) + \frac{1}{N+1} \rho_{1-\alpha}(s - \Phi(x)^\top \beta) + \frac{\lambda}{2} \|\beta\|_2^2. \quad (\text{B.5})$$

Let  $\beta_s(\mathcal{D}, x)$  and  $\beta_s(\mathcal{D}', x)$  denote the unique minimizers of (B.5) with  $\mathcal{D}$  and  $\mathcal{D}'$  respectively, and define

$$g_{\mathcal{D}}(x, s) := \Phi(x)^\top \beta_s(\mathcal{D}, x), \quad g_{\mathcal{D}'}(x, s) := \Phi(x)^\top \beta_s(\mathcal{D}', x).$$

By Assumption (1),  $\|\Phi(X_i)\|_2 \leq R$  almost surely, and the pinball loss is 1-Lipschitz. Hence each sample loss is  $R$ -Lipschitz in  $\beta$ . By Assumption (2), adding the ridge term makes the objective (B.5) strongly convex. Standard stability results for regularized ERM imply that replacing one data point perturbs the minimizer by at most

$$\|\beta_s(\mathcal{D}, x) - \beta_s(\mathcal{D}', x)\|_2 \leq \frac{C_1 R}{\lambda N}$$

for some universal constant  $C_1 > 0$ , uniformly over  $s \in [0, 1]$  and  $x$ .

Using Assumption (1) again,

$$|g_{\mathcal{D}}(x, s) - g_{\mathcal{D}'}(x, s)| \leq \|\Phi(x)\|_2 \|\beta_s(\mathcal{D}, x) - \beta_s(\mathcal{D}', x)\|_2 \leq \frac{C_1 R^2}{\lambda N}.$$

Thus there is a constant  $C_2 > 0$  such that

$$\sup_{x \in \mathcal{X}} \sup_{s \in [0, 1]} |g_{\mathcal{D}}(x, s) - g_{\mathcal{D}'}(x, s)| \leq \frac{C_2}{N}. \quad (\text{B.6})$$

The CFC threshold at  $x$  is

$$\widehat{\lambda}_\alpha^{(\mathcal{D})}(x) := \sup\{s \in [0, 1] : s \leq g_{\mathcal{D}}(x, s)\},$$

and similarly for  $\widehat{\lambda}_\alpha^{(\mathcal{D}')}(x)$ . Under the fixed-point construction in Eq. (4.3), this threshold is a Lipschitz functional of  $s \mapsto g_{\mathcal{D}}(x, s)$  in the uniform norm: there exists a constant  $C_3 > 0$  such that

$$\sup_{x \in \mathcal{X}} |\widehat{\lambda}_\alpha^{(\mathcal{D})}(x) - \widehat{\lambda}_\alpha^{(\mathcal{D}')}(x)| \leq \frac{C_3}{N}. \quad (\text{B.7})$$

For a fresh test pair  $(X, S)$ ,

$$Q(\mathcal{D}) = \mathbb{P}(S \leq \widehat{\lambda}_\alpha^{(\mathcal{D})}(X) \mid \mathcal{D}) = \mathbb{E}\left[F_{S|X}(\widehat{\lambda}_\alpha^{(\mathcal{D})}(X)) \mid \mathcal{D}\right],$$

where  $F_{S|X=x}(\cdot)$  is the conditional CDF of  $S$  given  $X = x$ .

By Assumption (3), for each  $x$  the map  $t \mapsto F_{S|X=x}(t)$  is  $L$ -Lipschitz on  $[0, 1]$ . Combining this with (B.7) yields

$$|Q(\mathcal{D}) - Q(\mathcal{D}')| \leq L \sup_{x \in \mathcal{X}} |\widehat{\lambda}_\alpha^{(\mathcal{D})}(x) - \widehat{\lambda}_\alpha^{(\mathcal{D}')}(x)| \leq \frac{C_4}{N},$$

where  $C_4 := LC_3$ . Thus  $Q(\mathcal{D}_{\text{cal}})$  satisfies bounded differences with constants  $c_i = C_4/N$  for  $i = 1, \dots, N$ .

By McDiarmid's inequality, for any  $\varepsilon > 0$ ,

$$\mathbb{P}(Q(\mathcal{D}_{\text{cal}}) \leq \mathbb{E}_{\mathcal{D}_{\text{cal}}}[Q(\mathcal{D}_{\text{cal}})] - \varepsilon) \leq \exp\left(-\frac{2N\varepsilon^2}{C_4^2}\right).$$

Given  $\delta \in (0, 1)$ , set

$$\varepsilon_N(\delta) := \frac{C_4}{\sqrt{2N}} \sqrt{\log \frac{1}{\delta}} = O\left(\sqrt{\frac{\log(1/\delta)}{N}}\right).$$

Then with probability at least  $1 - \delta$  over  $\mathcal{D}_{\text{cal}}$ ,

$$Q(\mathcal{D}_{\text{cal}}) \geq \mathbb{E}_{\mathcal{D}_{\text{cal}}}[Q(\mathcal{D}_{\text{cal}})] - \varepsilon_N(\delta). \quad (\text{B.8})$$

Combining (B.8) with (B.4) yields

$$Q(\mathcal{D}_{\text{cal}}) \geq 1 - \alpha - \varepsilon_N(\delta)$$

with probability at least  $1 - \delta$ , i.e.

$$\mathbb{P}(Z(X, S) = 1 \mid \mathcal{D}_{\text{cal}}) \geq 1 - \alpha - \varepsilon_N(\delta),$$

Finally, we have  $\alpha_{\text{eff}} = \max\{0, \alpha - \varepsilon_N(\delta)\} = \alpha - \varepsilon_N(\delta)$  (the slack is a small term) from algorithm 2, then,

$$\mathbb{P}\left(S \leq \widehat{\lambda}_{\alpha_{\text{eff}}}(X) \mid \mathcal{D}_{\text{cal}}\right) \geq 1 - \alpha_{\text{eff}} - \varepsilon_N(\delta) = 1 - \alpha,$$

□

### B.3. Proof of Proposition 4.3

*Proof.* Let

$$u_0 := 1 - \alpha, \quad u_{\bar{\lambda}}(t) := F_t(\bar{\lambda}).$$

Since  $\mathbb{P}(S \leq \bar{\lambda}) = 1 - \alpha$ , we have

$$\mathbb{E}[u_{\bar{\lambda}}(T)] = \mathbb{E}[F_T(\bar{\lambda})] = 1 - \alpha = u_0.$$

By Assumption 2, the map  $t \mapsto u_{\bar{\lambda}}(t)$  is nonincreasing.

Now,

$$\mathbb{E}[G_X(\lambda^*(X))] = \mathbb{E}[G_T(q_\alpha(T))] = \mathbb{E}[C_T(u_0)],$$

because  $q_\alpha(t) = F_t^{-1}(u_0)$ , and also

$$\mathbb{E}[G_X(\bar{\lambda})] = \mathbb{E}[G_T(\bar{\lambda})] = \mathbb{E}[C_T(u_{\bar{\lambda}}(T))].$$

Set

$$a(t) := u_{\bar{\lambda}}(t) - u_0.$$

Then  $a(t)$  is nonincreasing in  $t$  and

$$\mathbb{E}[a(T)] = 0.$$

By convexity of  $C_t(\cdot)$ , for each  $t$ ,

$$C_t(u_{\bar{\lambda}}(t)) \geq C_t(u_0) + \partial_u C_t(u_0) (u_{\bar{\lambda}}(t) - u_0).$$

Hence

$$C_t(u_{\bar{\lambda}}(t)) - C_t(u_0) \geq m(t) a(t), \quad m(t) := \partial_u C_t(u_0).$$

By Assumption 4,  $m(t)$  is nonincreasing in  $t$ . Since both  $m(t)$  and  $a(t)$  are nonincreasing, Chebyshev's rearrangement inequality gives

$$\mathbb{E}[m(T)a(T)] \geq \mathbb{E}[m(T)]\mathbb{E}[a(T)] = 0.$$

Taking expectations in the previous convexity bound yields

$$\mathbb{E}[C_T(u_{\bar{\lambda}}(T))] - \mathbb{E}[C_T(u_0)] \geq \mathbb{E}[m(T)a(T)] \geq 0.$$

Therefore,

$$\mathbb{E}[G_X(\bar{\lambda})] = \mathbb{E}[C_T(u_{\bar{\lambda}}(T))] \geq \mathbb{E}[C_T(u_0)] = \mathbb{E}[G_X(\lambda^*(X))].$$

For strictness, if  $\mathbb{P}(q_\alpha(X) \neq \bar{\lambda}_\alpha) > 0$ , then by strict monotonicity of each  $F_t$  we also have

$$\mathbb{P}(F_T(\bar{\lambda}_\alpha) \neq 1 - \alpha) > 0.$$

If  $C_t(\cdot)$  is strictly convex for almost every  $t$ , then the supporting-line inequality is strict on a set of positive probability, which implies

$$\mathbb{E}[G_X(\lambda^*(X))] < \mathbb{E}[G_X(\bar{\lambda}_\alpha)].$$

□

### B.4. Proof of Theorem 4.4

*Proof.* Let  $T = \psi(X)$  and set

$$u_0 := 1 - \alpha, \quad \lambda^*(X) = q_\alpha(T) = F_T^{-1}(u_0).$$

By Proposition 4.3,

$$\mathbb{E}[G_X(\lambda^*(X))] \leq \mathbb{E}[G_X(\bar{\lambda}_\alpha)], \tag{B.9}$$

with strict inequality under the additional strictness assumptions stated there.

It remains to show that

$$\mathbb{E}[G_X(\widehat{\lambda}_{\alpha, N}(X))] \longrightarrow \mathbb{E}[G_X(\lambda^*(X))].$$

Fix  $t$ . Since  $F_t$  is continuous and strictly increasing on  $[0, 1]$ , we have

$$F_t^{-1}(F_t(\lambda)) = \lambda \quad \text{for all } \lambda \in [0, 1].$$

By definition,

$$C_t(u) = G_t(F_t^{-1}(u)),$$

so for every  $\lambda \in [0, 1]$ ,

$$G_t(\lambda) = C_t(F_t(\lambda)).$$

Now  $u \mapsto C_t(u)$  is convex and differentiable on  $(0, 1)$  by Proposition 4.3, hence continuous on  $(0, 1)$ . Since

$$F_t(\lambda^*(t)) = F_t(F_t^{-1}(u_0)) = u_0 = 1 - \alpha \in (0, 1),$$

it follows that  $\lambda \mapsto G_t(\lambda)$  is continuous at  $\lambda^*(t)$ .

Now fix  $x \in \mathcal{X}$ . By the assumed uniform consistency,

$$|\widehat{\lambda}_{\alpha, N}(x) - \lambda^*(x)| \leq \sup_{z \in \mathcal{X}} |\widehat{\lambda}_{\alpha, N}(z) - \lambda^*(z)| \xrightarrow{p} 0,$$

so

$$\widehat{\lambda}_{\alpha, N}(x) \xrightarrow{p} \lambda^*(x).$$

Since  $G_x(\cdot)$  is continuous at  $\lambda^*(x)$ , the continuous mapping theorem yields

$$G_x(\widehat{\lambda}_{\alpha, N}(x)) \xrightarrow{p} G_x(\lambda^*(x)).$$

For  $\varepsilon > 0$ , define

$$p_{N, \varepsilon}(x) := \mathbb{P}_{\mathcal{D}_{\text{cal}}} \left( \left| G_x(\widehat{\lambda}_{\alpha, N}(x)) - G_x(\lambda^*(x)) \right| > \varepsilon \right).$$

Then  $p_{N, \varepsilon}(x) \rightarrow 0$  for every fixed  $x$ , and  $0 \leq p_{N, \varepsilon}(x) \leq 1$ . Since the fresh test point  $X$  is independent of the calibration sample,

$$\mathbb{P} \left( \left| G_X(\widehat{\lambda}_{\alpha, N}(X)) - G_X(\lambda^*(X)) \right| > \varepsilon \right) = \mathbb{E}_X [p_{N, \varepsilon}(X)] \rightarrow 0$$

by dominated convergence. Therefore,

$$G_X(\widehat{\lambda}_{\alpha, N}(X)) \xrightarrow{p} G_X(\lambda^*(X)).$$

Moreover,

$$0 \leq G_X(\widehat{\lambda}_{\alpha, N}(X)) \leq 1, \quad 0 \leq G_X(\lambda^*(X)) \leq 1,$$

so the sequence is uniformly integrable. Hence convergence in probability upgrades to convergence in  $L^1$ , and therefore

$$\lim_{N \rightarrow \infty} \mathbb{E} [G_X(\widehat{\lambda}_{\alpha, N}(X))] = \mathbb{E} [G_X(\lambda^*(X))].$$

Combining this with (B.9) proves

$$\lim_{N \rightarrow \infty} \mathbb{E} [G_X(\widehat{\lambda}_{\alpha, N}(X))] \leq \mathbb{E} [G_X(\bar{\lambda}_\alpha)],$$

with strict inequality under the additional strictness assumptions from Proposition 4.3.

Finally, conditional on  $X$  and a threshold  $\lambda$ , each of the  $M$  sampled candidates is accepted with probability  $G_X(\lambda)$ , so

$$\mathbb{E} [|\widehat{C}_{\alpha, N}(X)| \mid X, \widehat{\lambda}_{\alpha, N}(X)] = M G_X(\widehat{\lambda}_{\alpha, N}(X)).$$

Taking expectations gives

$$\mathbb{E} [|\widehat{C}_{\alpha, N}(X)|] = M \mathbb{E} [G_X(\widehat{\lambda}_{\alpha, N}(X))].$$

Passing to the limit yields

$$\lim_{N \rightarrow \infty} \mathbb{E} [|\widehat{C}_{\alpha, N}(X)|] = M \mathbb{E} [G_X(\lambda^*(X))] \leq M \mathbb{E} [G_X(\bar{\lambda}_\alpha)],$$

with strict inequality under the same additional assumptions. □

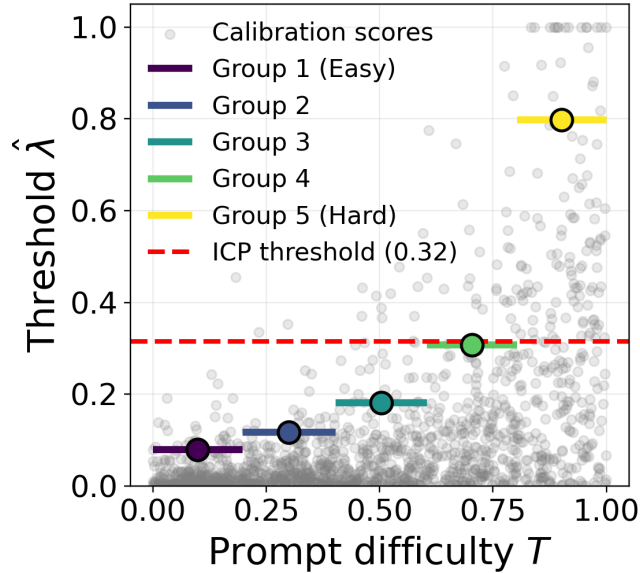

Figure 5. Learned threshold  $\hat{\lambda}_\alpha(X)$  versus prompt difficulty in the updated synthetic run ( $\alpha = 0.10$ , 5 bins). Easy prompts receive stricter thresholds, while harder prompts receive looser thresholds, explaining the improved group-wise coverage of CFC relative to global-threshold baselines.

## C. Additional experiments

### C.1. Synthetic Data

**Setup details.** All synthetic appendix results use the same clean synthetic generator as the main text. Each prompt has a scalar difficulty variable  $T \in [0, 1]$ , we draw  $M$  candidates, and define the prompt-level latent success score as  $S(X) = \min\{V_j : A_j = 1\}$ , with  $S(X) = 1$  if no sampled candidate is correct. Unless varied explicitly in the ablations, we use  $N_{\text{cal}} = N_{\text{test}} = 10,000$  and  $M = 50$ . Throughout the synthetic appendix, ECR and GSC use the ground-truth correctness labels rather than the surrogate event  $S(X) \leq \hat{\lambda}(X)$ . The main synthetic comparisons use 10 equal-frequency bins for GSC, the threshold-adaptation plot below uses 5 bins for readability, and CFC-PAC uses the same stability-mode adjustment with  $\delta = 0.90$  as in the main synthetic experiments.

**Threshold adaptation versus prompt difficulty.** Figure 5 visualizes the learned threshold as a function of prompt difficulty in the updated synthetic run at  $\alpha = 0.10$  using 5 difficulty bins. As expected, CFC assigns stricter thresholds to easy prompts and looser thresholds to hard prompts. This is exactly the adaptive behavior that a single global-threshold baseline cannot express.

**Full target-risk sweep.** Table 7 reports the full synthetic sweep across target error rates. As above, ECR and GSC use ground-truth correctness labels, and CFC-PAC uses the stability-mode adjustment with  $\delta = 0.90$  throughout. We include LEARN CP in the full sweep to separate gains from learning a better threshold from gains due to exact conditional conformalization.

**Sensitivity to calibration size and sampling budget.** Table 8 reports a representative synthetic ablation of CFC and CFC-PAC as we vary the number of calibration points  $N_{\text{cal}}$  and the sampling budget  $M$ , using the same 10-bin setting as the main synthetic comparison. For consistency with the main synthetic experiments, CFC-PAC uses the same stability-mode adjustment with  $\delta = 0.90$ , and all reported coverages are true label-based coverages. Figure 6 shows the corresponding group-level miscoverage profile.

Table 7. Results at different target error rates  $\alpha$ .

| Methods        | $\alpha = 0.10$ |                |                   | $\alpha = 0.15$ |                |                   |
|----------------|-----------------|----------------|-------------------|-----------------|----------------|-------------------|
|                | ECR             | GSC $\uparrow$ | APSS $\downarrow$ | ECR             | GSC $\uparrow$ | APSS $\downarrow$ |
| TopK           | 90.6 $\pm$ 0.1  | 58.2 $\pm$ 1.3 | 16.00 $\pm$ 0.00  | 85.0 $\pm$ 1.6  | 44.9 $\pm$ 2.3 | 10.80 $\pm$ 0.98  |
| ICP            | 90.2 $\pm$ 0.2  | 57.4 $\pm$ 1.4 | 16.71 $\pm$ 0.23  | 85.3 $\pm$ 0.6  | 46.5 $\pm$ 1.4 | 12.11 $\pm$ 0.28  |
| Learnt CP      | 90.2 $\pm$ 0.3  | 84.3 $\pm$ 0.5 | 15.72 $\pm$ 0.15  | 85.2 $\pm$ 0.6  | 77.4 $\pm$ 0.6 | 12.44 $\pm$ 0.17  |
| CFC (ours)     | 90.3 $\pm$ 0.5  | 88.7 $\pm$ 0.7 | 15.53 $\pm$ 0.12  | 85.2 $\pm$ 0.6  | 82.7 $\pm$ 0.8 | 12.42 $\pm$ 0.09  |
| CFC-PAC (ours) | 90.8 $\pm$ 0.6  | 89.1 $\pm$ 0.5 | 15.87 $\pm$ 0.16  | 85.6 $\pm$ 0.6  | 83.4 $\pm$ 1.1 | 12.66 $\pm$ 0.07  |
| Methods        | $\alpha = 0.20$ |                |                   | $\alpha = 0.25$ |                |                   |
|                | ECR             | GSC $\uparrow$ | APSS $\downarrow$ | ECR             | GSC $\uparrow$ | APSS $\downarrow$ |
| TopK           | 79.7 $\pm$ 0.2  | 36.5 $\pm$ 0.9 | 8.00 $\pm$ 0.00   | 73.6 $\pm$ 0.2  | 29.4 $\pm$ 1.2 | 6.00 $\pm$ 0.00   |
| ICP            | 80.3 $\pm$ 0.7  | 37.9 $\pm$ 1.6 | 9.32 $\pm$ 0.26   | 75.4 $\pm$ 0.8  | 31.6 $\pm$ 1.4 | 7.43 $\pm$ 0.21   |
| Learnt CP      | 80.2 $\pm$ 0.6  | 71.2 $\pm$ 0.9 | 10.31 $\pm$ 0.09  | 75.4 $\pm$ 0.8  | 65.1 $\pm$ 1.6 | 8.72 $\pm$ 0.13   |
| CFC (ours)     | 80.2 $\pm$ 0.6  | 77.4 $\pm$ 0.7 | 10.39 $\pm$ 0.07  | 75.3 $\pm$ 0.8  | 72.1 $\pm$ 1.2 | 8.80 $\pm$ 0.10   |
| CFC-PAC (ours) | 80.6 $\pm$ 0.6  | 78.1 $\pm$ 0.6 | 10.53 $\pm$ 0.07  | 75.7 $\pm$ 0.8  | 72.4 $\pm$ 1.2 | 8.89 $\pm$ 0.10   |
| Methods        | $\alpha = 0.30$ |                |                   | $\alpha = 0.35$ |                |                   |
|                | ECR             | GSC $\uparrow$ | APSS $\downarrow$ | ECR             | GSC $\uparrow$ | APSS $\downarrow$ |
| TopK           | 73.6 $\pm$ 0.2  | 29.4 $\pm$ 1.2 | 6.00 $\pm$ 0.00   | 64.2 $\pm$ 0.3  | 21.7 $\pm$ 1.4 | 4.00 $\pm$ 0.00   |
| ICP            | 70.5 $\pm$ 0.8  | 27.1 $\pm$ 1.5 | 6.00 $\pm$ 0.19   | 65.6 $\pm$ 0.7  | 23.1 $\pm$ 1.0 | 4.91 $\pm$ 0.16   |
| Learnt CP      | 70.4 $\pm$ 0.9  | 59.6 $\pm$ 1.7 | 7.37 $\pm$ 0.12   | 65.5 $\pm$ 1.0  | 54.7 $\pm$ 1.6 | 6.32 $\pm$ 0.14   |
| CFC (ours)     | 70.4 $\pm$ 0.9  | 66.5 $\pm$ 1.4 | 7.53 $\pm$ 0.11   | 65.5 $\pm$ 0.8  | 61.3 $\pm$ 1.8 | 6.48 $\pm$ 0.10   |
| CFC-PAC (ours) | 70.7 $\pm$ 0.9  | 66.8 $\pm$ 1.3 | 7.60 $\pm$ 0.11   | 65.8 $\pm$ 0.9  | 61.5 $\pm$ 1.9 | 6.55 $\pm$ 0.11   |
| Methods        | $\alpha = 0.40$ |                |                   | $\alpha = 0.45$ |                |                   |
|                | ECR             | GSC $\uparrow$ | APSS $\downarrow$ | ECR             | GSC $\uparrow$ | APSS $\downarrow$ |
| TopK           | 64.2 $\pm$ 0.3  | 21.7 $\pm$ 1.4 | 4.00 $\pm$ 0.00   | 64.2 $\pm$ 0.3  | 21.7 $\pm$ 1.4 | 4.00 $\pm$ 0.00   |
| ICP            | 60.8 $\pm$ 0.8  | 19.4 $\pm$ 0.7 | 4.06 $\pm$ 0.13   | 55.6 $\pm$ 1.0  | 16.5 $\pm$ 0.9 | 3.32 $\pm$ 0.13   |
| Learnt CP      | 60.4 $\pm$ 0.9  | 49.6 $\pm$ 1.8 | 5.40 $\pm$ 0.13   | 55.7 $\pm$ 1.0  | 45.5 $\pm$ 1.6 | 4.66 $\pm$ 0.10   |
| CFC (ours)     | 60.5 $\pm$ 0.7  | 56.4 $\pm$ 1.7 | 5.58 $\pm$ 0.08   | 55.6 $\pm$ 0.8  | 51.9 $\pm$ 1.5 | 4.83 $\pm$ 0.10   |
| CFC-PAC (ours) | 60.9 $\pm$ 0.7  | 56.6 $\pm$ 1.6 | 5.62 $\pm$ 0.09   | 56.0 $\pm$ 0.9  | 52.3 $\pm$ 1.5 | 4.88 $\pm$ 0.11   |

Table 8. Ablation of CFC vs. CFC-PAC on synthetic data, with 10 bins.

| $N_{\text{cat}}$ | $M$ | CFC               |                  | CFC-PAC           |                  |
|------------------|-----|-------------------|------------------|-------------------|------------------|
|                  |     | True cov.         | Mean set         | True cov.         | Mean set         |
| 2000             | 50  | 0.799 $\pm$ 0.006 | 10.60 $\pm$ 0.35 | 0.808 $\pm$ 0.005 | 10.92 $\pm$ 0.30 |
| 2000             | 100 | 0.809 $\pm$ 0.012 | 9.77 $\pm$ 0.31  | 0.819 $\pm$ 0.012 | 10.15 $\pm$ 0.29 |
| 2000             | 150 | 0.796 $\pm$ 0.006 | 9.03 $\pm$ 0.43  | 0.807 $\pm$ 0.006 | 9.37 $\pm$ 0.43  |
| 5000             | 50  | 0.801 $\pm$ 0.004 | 10.45 $\pm$ 0.12 | 0.808 $\pm$ 0.004 | 10.69 $\pm$ 0.16 |
| 5000             | 100 | 0.803 $\pm$ 0.008 | 9.52 $\pm$ 0.19  | 0.809 $\pm$ 0.007 | 9.74 $\pm$ 0.15  |
| 5000             | 150 | 0.802 $\pm$ 0.006 | 9.13 $\pm$ 0.26  | 0.808 $\pm$ 0.007 | 9.35 $\pm$ 0.27  |
| 10000            | 50  | 0.802 $\pm$ 0.006 | 10.39 $\pm$ 0.07 | 0.806 $\pm$ 0.006 | 10.53 $\pm$ 0.07 |
| 10000            | 100 | 0.803 $\pm$ 0.005 | 9.54 $\pm$ 0.06  | 0.808 $\pm$ 0.006 | 9.69 $\pm$ 0.09  |
| 10000            | 150 | 0.799 $\pm$ 0.008 | 9.15 $\pm$ 0.15  | 0.803 $\pm$ 0.008 | 9.29 $\pm$ 0.15  |

## C.2. Real-World Data

### C.2.1. TriviaQA

**Full target-risk sweep.** For the chosen TriviaQA feature map, we compute the rank-normalized answer-distribution entropy  $T_{\text{ent}}(X)$  and the rank-normalized maximum verifier loss  $T_{\text{loss}}(X)$  on the calibration split, then assign a prompt to the hard group when  $\max\{T_{\text{ent}}(X), T_{\text{loss}}(X)\} \geq q_{0.925}$ , where  $q_{0.925}$  is the calibration 92.5th percentile of that combined score. Table 9 reports the full TriviaQA sweep under this chosen feature map. The full table makes the main-paper tradeoff more explicit: **CFC** is the most size-efficient of our methods, while **CFC-PAC-FULL** is the strongest at hitting the target coverage with a higher subgroup floor.

### C.2.2. GSM8K

**Full target-risk sweep.** Table 10 reports the full GSM8K target-risk sweep for the chosen setting from the main paper: we keep the first 5 sampled candidates per prompt, define  $T(X)$  as the mean verifier loss across those candidates, and use the quadratic basis  $\Phi(X) = [1, T(X), T(X)^2]$ . The same qualitative pattern holds across the sweep: the conditional methods

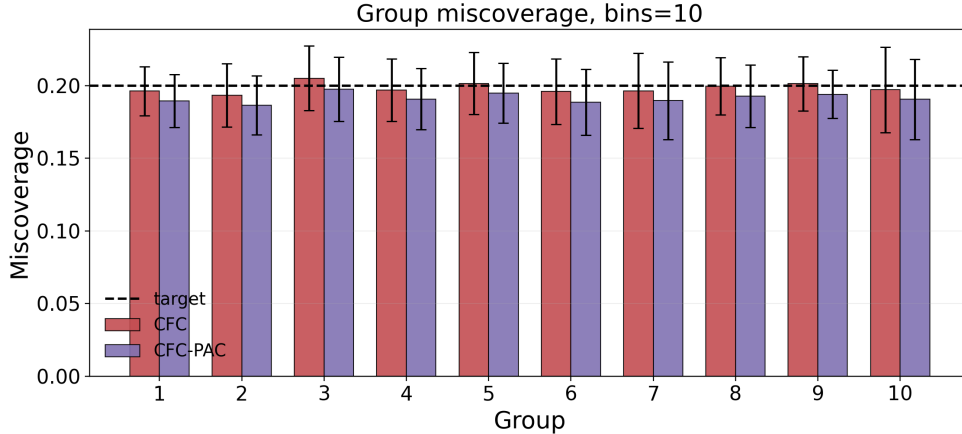

Figure 6. Group miscoverage for CFC and CFC-PAC, with 10 bins.

Table 9. Full TriviaQA sweep across target error rates  $\alpha$  under the calibration-defined split  $\max\{T_{\text{ent}}(X), T_{\text{loss}}(X)\} \geq q_{0.925}$ . APSS below 1 indicates that the method abstains and returns the empty set on some prompts. ECR and GSC are reported in percent; for ECR, values closest to the target coverage  $1 - \alpha$  are preferred.

| Methods             | $\alpha = 0.20$ |                |                   | $\alpha = 0.25$ |                |                   | $\alpha = 0.30$ |                |                   |
|---------------------|-----------------|----------------|-------------------|-----------------|----------------|-------------------|-----------------|----------------|-------------------|
|                     | ECR             | GSC $\uparrow$ | APSS $\downarrow$ | ECR             | GSC $\uparrow$ | APSS $\downarrow$ | ECR             | GSC $\uparrow$ | APSS $\downarrow$ |
| TopK                | 81.6 $\pm$ 0.3  | 69.7 $\pm$ 1.5 | 1.75 $\pm$ 0.00   | 73.4 $\pm$ 0.3  | 55.9 $\pm$ 1.6 | 1.00 $\pm$ 0.00   | 73.4 $\pm$ 0.3  | 55.9 $\pm$ 1.6 | 1.00 $\pm$ 0.00   |
| ICP                 | 80.0 $\pm$ 0.5  | 65.1 $\pm$ 1.5 | 1.43 $\pm$ 0.02   | 74.9 $\pm$ 0.3  | 56.7 $\pm$ 1.9 | 1.08 $\pm$ 0.01   | 69.5 $\pm$ 0.8  | 49.3 $\pm$ 2.7 | 0.90 $\pm$ 0.02   |
| Learnt CP           | 79.6 $\pm$ 0.5  | 76.3 $\pm$ 1.6 | 1.69 $\pm$ 0.04   | 74.7 $\pm$ 0.4  | 74.0 $\pm$ 1.1 | 1.22 $\pm$ 0.03   | 69.5 $\pm$ 0.7  | 68.7 $\pm$ 1.3 | 0.97 $\pm$ 0.02   |
| CFC (ours)          | 76.2 $\pm$ 0.5  | 65.4 $\pm$ 1.7 | 1.21 $\pm$ 0.01   | 72.7 $\pm$ 0.4  | 65.2 $\pm$ 1.8 | 1.03 $\pm$ 0.03   | 68.4 $\pm$ 0.7  | 62.8 $\pm$ 2.0 | 0.88 $\pm$ 0.01   |
| CFC-PAC (ours)      | 76.4 $\pm$ 0.5  | 65.4 $\pm$ 1.7 | 1.22 $\pm$ 0.01   | 73.1 $\pm$ 0.5  | 65.3 $\pm$ 1.8 | 1.05 $\pm$ 0.04   | 68.8 $\pm$ 0.7  | 62.9 $\pm$ 2.1 | 0.89 $\pm$ 0.02   |
| CFC-FULL (ours)     | 79.6 $\pm$ 0.5  | 76.3 $\pm$ 1.6 | 1.69 $\pm$ 0.04   | 74.8 $\pm$ 0.3  | 74.1 $\pm$ 1.1 | 1.26 $\pm$ 0.09   | 69.6 $\pm$ 0.7  | 68.9 $\pm$ 1.1 | 0.97 $\pm$ 0.02   |
| CFC-PAC-FULL (ours) | 80.1 $\pm$ 0.5  | 76.3 $\pm$ 1.6 | 1.72 $\pm$ 0.04   | 75.3 $\pm$ 0.4  | 74.6 $\pm$ 1.0 | 1.32 $\pm$ 0.10   | 70.0 $\pm$ 0.8  | 69.2 $\pm$ 1.3 | 0.99 $\pm$ 0.03   |
| Methods             | $\alpha = 0.35$ |                |                   | $\alpha = 0.40$ |                |                   | $\alpha = 0.45$ |                |                   |
|                     | ECR             | GSC $\uparrow$ | APSS $\downarrow$ | ECR             | GSC $\uparrow$ | APSS $\downarrow$ | ECR             | GSC $\uparrow$ | APSS $\downarrow$ |
| TopK                | 73.4 $\pm$ 0.3  | 55.9 $\pm$ 1.6 | 1.00 $\pm$ 0.00   | 73.4 $\pm$ 0.3  | 55.9 $\pm$ 1.6 | 1.00 $\pm$ 0.00   | 73.4 $\pm$ 0.3  | 55.9 $\pm$ 1.6 | 1.00 $\pm$ 0.00   |
| ICP                 | 64.5 $\pm$ 0.6  | 43.0 $\pm$ 2.1 | 0.78 $\pm$ 0.01   | 59.9 $\pm$ 0.9  | 36.1 $\pm$ 3.1 | 0.70 $\pm$ 0.01   | 54.8 $\pm$ 0.9  | 29.6 $\pm$ 2.3 | 0.62 $\pm$ 0.01   |
| Learnt CP           | 64.6 $\pm$ 0.7  | 63.0 $\pm$ 2.1 | 0.82 $\pm$ 0.02   | 59.9 $\pm$ 0.8  | 58.2 $\pm$ 2.4 | 0.72 $\pm$ 0.01   | 55.2 $\pm$ 1.0  | 53.8 $\pm$ 1.7 | 0.65 $\pm$ 0.01   |
| CFC (ours)          | 63.9 $\pm$ 0.7  | 59.2 $\pm$ 2.3 | 0.78 $\pm$ 0.01   | 59.5 $\pm$ 0.9  | 55.8 $\pm$ 2.7 | 0.70 $\pm$ 0.01   | 54.9 $\pm$ 1.0  | 52.3 $\pm$ 2.4 | 0.63 $\pm$ 0.01   |
| CFC-PAC (ours)      | 64.3 $\pm$ 0.7  | 59.5 $\pm$ 2.4 | 0.78 $\pm$ 0.01   | 59.9 $\pm$ 0.8  | 56.4 $\pm$ 2.9 | 0.70 $\pm$ 0.01   | 55.4 $\pm$ 1.0  | 52.8 $\pm$ 2.6 | 0.64 $\pm$ 0.01   |
| CFC-FULL (ours)     | 64.7 $\pm$ 0.7  | 63.2 $\pm$ 2.0 | 0.82 $\pm$ 0.02   | 59.9 $\pm$ 0.9  | 58.4 $\pm$ 2.2 | 0.72 $\pm$ 0.01   | 55.2 $\pm$ 1.0  | 53.8 $\pm$ 1.7 | 0.65 $\pm$ 0.01   |
| CFC-PAC-FULL (ours) | 65.1 $\pm$ 0.8  | 63.7 $\pm$ 2.2 | 0.83 $\pm$ 0.02   | 60.4 $\pm$ 0.8  | 59.0 $\pm$ 2.2 | 0.73 $\pm$ 0.01   | 55.7 $\pm$ 1.0  | 54.3 $\pm$ 1.9 | 0.65 $\pm$ 0.01   |

remain much more efficient than ICP while sharply improving worst-group coverage.

**Candidate-budget ablation.** Table 11 compares the chosen  $N = 5$  budget against  $N = 20$  at the representative target  $\alpha = 0.10$ , keeping the same mean-loss proxy and quadratic basis. The larger candidate budget barely changes target calibration, but it inflates APSS substantially for every threshold-based method. This is why the main paper uses the smaller budget on GSM8K: the extra samples add little new diversity but materially hurt efficiency.

### C.2.3. Flickr8k

**Full target-risk sweep.** Table 12 reports the full Flickr8k sweep for the chosen clean setting from the main paper: we keep up to two cached candidates per image, define  $T(X)$  as the mean verifier loss across those candidates, and use the quadratic basis  $\Phi(X) = [1, T(X), T(X)^2]$ . This benchmark is visibly easier than GSM8K or TriviaQA, so the most informative comparison is closeness to the target coverage together with subgroup reliability. At  $\alpha = 0.03$  (target coverage 97%), **CFC-PAC-FULL** is the closest full-set variant to target while improving GSC over every baseline, whereas **CFC** collapses to almost one caption per image and is best viewed as the smallest-size extreme.

Table 10. Full GSM8K sweep across target error rates  $\alpha$  using the first five sampled candidates per prompt,  $T(X)$  equal to mean verifier loss, and the quadratic basis  $\Phi(X) = [1, T(X), T(X)^2]$ . ECR and GSC are reported in percent; for ECR, values closest to the target coverage  $1 - \alpha$  are preferred.

| Methods             | $\alpha = 0.05$  |                  |                   | $\alpha = 0.10$  |                  |                   | $\alpha = 0.15$  |                  |                   |
|---------------------|------------------|------------------|-------------------|------------------|------------------|-------------------|------------------|------------------|-------------------|
|                     | ECR              | GSC $\uparrow$   | APSS $\downarrow$ | ECR              | GSC $\uparrow$   | APSS $\downarrow$ | ECR              | GSC $\uparrow$   | APSS $\downarrow$ |
| TopK                | 96.42 $\pm$ 0.39 | 86.52 $\pm$ 1.11 | 1.00 $\pm$ 0.00   | 96.42 $\pm$ 0.39 | 86.52 $\pm$ 1.11 | 1.00 $\pm$ 0.00   | 96.42 $\pm$ 0.39 | 86.52 $\pm$ 1.11 | 1.00 $\pm$ 0.00   |
| ICP                 | 95.09 $\pm$ 1.42 | 79.85 $\pm$ 6.53 | 4.73 $\pm$ 0.09   | 90.39 $\pm$ 1.44 | 56.36 $\pm$ 6.20 | 4.36 $\pm$ 0.08   | 83.91 $\pm$ 2.15 | 27.73 $\pm$ 8.14 | 3.97 $\pm$ 0.11   |
| Learnt CP           | 94.91 $\pm$ 1.03 | 88.48 $\pm$ 3.05 | 4.01 $\pm$ 0.98   | 90.09 $\pm$ 1.38 | 86.06 $\pm$ 0.77 | 2.22 $\pm$ 0.07   | 84.70 $\pm$ 1.11 | 79.09 $\pm$ 1.56 | 1.92 $\pm$ 0.06   |
| CFC (ours)          | 94.82 $\pm$ 0.97 | 88.48 $\pm$ 2.32 | 2.35 $\pm$ 0.43   | 90.18 $\pm$ 1.41 | 86.36 $\pm$ 1.07 | 1.49 $\pm$ 0.04   | 84.97 $\pm$ 1.12 | 79.55 $\pm$ 1.52 | 1.34 $\pm$ 0.04   |
| CFC-FULL (ours)     | 95.03 $\pm$ 0.97 | 88.94 $\pm$ 2.74 | 4.08 $\pm$ 0.93   | 90.30 $\pm$ 1.40 | 86.36 $\pm$ 1.07 | 2.23 $\pm$ 0.08   | 85.09 $\pm$ 1.03 | 79.55 $\pm$ 1.52 | 1.96 $\pm$ 0.06   |
| CFC-PAC (ours)      | 95.03 $\pm$ 1.33 | 88.18 $\pm$ 2.47 | 2.59 $\pm$ 0.29   | 91.79 $\pm$ 1.66 | 88.18 $\pm$ 1.41 | 1.55 $\pm$ 0.06   | 86.64 $\pm$ 0.95 | 81.67 $\pm$ 1.11 | 1.38 $\pm$ 0.03   |
| CFC-PAC-FULL (ours) | 95.24 $\pm$ 1.40 | 88.79 $\pm$ 3.01 | 4.59 $\pm$ 0.62   | 91.91 $\pm$ 1.68 | 88.48 $\pm$ 1.62 | 2.34 $\pm$ 0.11   | 86.76 $\pm$ 0.88 | 81.67 $\pm$ 1.11 | 2.05 $\pm$ 0.05   |

  

| Methods             | $\alpha = 0.20$  |                  |                   | $\alpha = 0.25$  |                  |                   | $\alpha = 0.30$  |                  |                   |
|---------------------|------------------|------------------|-------------------|------------------|------------------|-------------------|------------------|------------------|-------------------|
|                     | ECR              | GSC $\uparrow$   | APSS $\downarrow$ | ECR              | GSC $\uparrow$   | APSS $\downarrow$ | ECR              | GSC $\uparrow$   | APSS $\downarrow$ |
| TopK                | 96.42 $\pm$ 0.39 | 86.52 $\pm$ 1.11 | 1.00 $\pm$ 0.00   | 96.42 $\pm$ 0.39 | 86.52 $\pm$ 1.11 | 1.00 $\pm$ 0.00   | 96.42 $\pm$ 0.39 | 86.52 $\pm$ 1.11 | 1.00 $\pm$ 0.00   |
| ICP                 | 79.55 $\pm$ 2.91 | 18.48 $\pm$ 4.92 | 3.69 $\pm$ 0.16   | 74.64 $\pm$ 2.53 | 13.48 $\pm$ 1.30 | 3.38 $\pm$ 0.15   | 70.18 $\pm$ 2.51 | 10.15 $\pm$ 0.91 | 3.11 $\pm$ 0.13   |
| Learnt CP           | 79.42 $\pm$ 1.87 | 71.36 $\pm$ 3.63 | 1.74 $\pm$ 0.10   | 74.82 $\pm$ 2.51 | 66.97 $\pm$ 2.90 | 1.57 $\pm$ 0.07   | 69.36 $\pm$ 2.48 | 60.91 $\pm$ 2.23 | 1.42 $\pm$ 0.08   |
| CFC (ours)          | 79.94 $\pm$ 1.80 | 72.12 $\pm$ 3.85 | 1.22 $\pm$ 0.04   | 75.03 $\pm$ 2.52 | 67.12 $\pm$ 2.86 | 1.12 $\pm$ 0.05   | 69.55 $\pm$ 2.53 | 61.21 $\pm$ 2.11 | 1.01 $\pm$ 0.05   |
| CFC-FULL (ours)     | 80.06 $\pm$ 1.78 | 72.12 $\pm$ 3.85 | 1.76 $\pm$ 0.08   | 75.15 $\pm$ 2.47 | 67.12 $\pm$ 2.86 | 1.60 $\pm$ 0.07   | 69.64 $\pm$ 2.48 | 61.21 $\pm$ 2.11 | 1.44 $\pm$ 0.09   |
| CFC-PAC (ours)      | 81.36 $\pm$ 1.68 | 73.18 $\pm$ 4.27 | 1.25 $\pm$ 0.04   | 75.94 $\pm$ 2.47 | 68.03 $\pm$ 2.81 | 1.13 $\pm$ 0.05   | 70.82 $\pm$ 2.58 | 62.58 $\pm$ 2.01 | 1.04 $\pm$ 0.05   |
| CFC-PAC-FULL (ours) | 81.48 $\pm$ 1.65 | 73.18 $\pm$ 4.27 | 1.82 $\pm$ 0.08   | 76.06 $\pm$ 2.42 | 68.03 $\pm$ 2.81 | 1.63 $\pm$ 0.07   | 70.94 $\pm$ 2.52 | 62.58 $\pm$ 2.01 | 1.48 $\pm$ 0.08   |

Table 11. GSM8K sample-budget ablation at  $\alpha = 0.10$  under the mean-loss quadratic rule. Each budget uses the same basis  $\Phi(X) = [1, T(X), T(X)^2]$ , differing only in the number of retained sampled candidates per prompt.

| Methods             | $N = 5$          |                  |                   | $N = 20$         |                  |                   |
|---------------------|------------------|------------------|-------------------|------------------|------------------|-------------------|
|                     | ECR              | GSC $\uparrow$   | APSS $\downarrow$ | ECR              | GSC $\uparrow$   | APSS $\downarrow$ |
| TopK                | 96.42 $\pm$ 0.39 | 86.52 $\pm$ 1.11 | 1.00 $\pm$ 0.00   | 96.70 $\pm$ 0.36 | 88.48 $\pm$ 1.11 | 1.00 $\pm$ 0.00   |
| ICP                 | 90.39 $\pm$ 1.44 | 56.36 $\pm$ 6.20 | 4.36 $\pm$ 0.08   | 90.15 $\pm$ 1.37 | 55.76 $\pm$ 5.52 | 16.75 $\pm$ 0.35  |
| Learnt CP           | 90.09 $\pm$ 1.38 | 86.06 $\pm$ 0.77 | 2.22 $\pm$ 0.07   | 90.15 $\pm$ 0.81 | 87.42 $\pm$ 1.41 | 7.24 $\pm$ 0.33   |
| CFC (ours)          | 90.18 $\pm$ 1.41 | 86.36 $\pm$ 1.07 | 1.49 $\pm$ 0.04   | 90.30 $\pm$ 0.63 | 87.73 $\pm$ 1.47 | 3.79 $\pm$ 0.12   |
| CFC-FULL (ours)     | 90.30 $\pm$ 1.40 | 86.36 $\pm$ 1.07 | 2.23 $\pm$ 0.08   | 90.45 $\pm$ 0.70 | 87.73 $\pm$ 1.47 | 7.50 $\pm$ 0.18   |
| CFC-PAC (ours)      | 91.79 $\pm$ 1.66 | 88.18 $\pm$ 1.41 | 1.55 $\pm$ 0.06   | 91.91 $\pm$ 0.46 | 88.64 $\pm$ 2.30 | 3.99 $\pm$ 0.07   |
| CFC-PAC-FULL (ours) | 91.91 $\pm$ 1.68 | 88.48 $\pm$ 1.62 | 2.34 $\pm$ 0.11   | 92.06 $\pm$ 0.57 | 88.79 $\pm$ 2.46 | 7.97 $\pm$ 0.03   |

Table 12. Full Flickr8k sweep with QWEN2-VL-7B-INSTRUCT using up to two cached candidates per image,  $T(X)$  equal to mean verifier loss, and the quadratic basis  $\Phi(X) = [1, T(X), T(X)^2]$ . ECR and GSC are reported in percent; for ECR, values closest to the target coverage  $1 - \alpha$  are preferred.

| Methods             | $\alpha = 0.01$  |                  |                   | $\alpha = 0.02$  |                  |                   | $\alpha = 0.03$  |                  |                   |
|---------------------|------------------|------------------|-------------------|------------------|------------------|-------------------|------------------|------------------|-------------------|
|                     | ECR              | GSC $\uparrow$   | APSS $\downarrow$ | ECR              | GSC $\uparrow$   | APSS $\downarrow$ | ECR              | GSC $\uparrow$   | APSS $\downarrow$ |
| TopK                | 97.75 $\pm$ 0.19 | 95.62 $\pm$ 0.71 | 2.00 $\pm$ 0.00   | 97.75 $\pm$ 0.19 | 95.62 $\pm$ 0.71 | 2.00 $\pm$ 0.00   | 96.37 $\pm$ 0.17 | 93.23 $\pm$ 0.47 | 1.00 $\pm$ 0.00   |
| ICP                 | 97.29 $\pm$ 0.29 | 93.33 $\pm$ 1.45 | 1.93 $\pm$ 0.01   | 96.25 $\pm$ 0.66 | 88.23 $\pm$ 3.66 | 1.87 $\pm$ 0.02   | 95.58 $\pm$ 0.54 | 85.21 $\pm$ 3.14 | 1.84 $\pm$ 0.01   |
| Learnt CP           | 97.39 $\pm$ 0.33 | 95.52 $\pm$ 0.85 | 1.74 $\pm$ 0.06   | 97.06 $\pm$ 0.31 | 95.10 $\pm$ 0.63 | 1.34 $\pm$ 0.07   | 96.16 $\pm$ 0.17 | 94.48 $\pm$ 0.26 | 1.22 $\pm$ 0.07   |
| CFC (ours)          | 96.37 $\pm$ 0.17 | 93.23 $\pm$ 0.47 | 1.00 $\pm$ 0.00   | 96.37 $\pm$ 0.17 | 93.23 $\pm$ 0.47 | 1.00 $\pm$ 0.00   | 95.81 $\pm$ 0.38 | 93.23 $\pm$ 0.47 | 0.99 $\pm$ 0.00   |
| CFC-FULL (ours)     | 97.66 $\pm$ 0.16 | 95.62 $\pm$ 0.71 | 1.86 $\pm$ 0.04   | 97.27 $\pm$ 0.21 | 95.21 $\pm$ 0.77 | 1.40 $\pm$ 0.06   | 96.27 $\pm$ 0.24 | 94.58 $\pm$ 0.26 | 1.25 $\pm$ 0.08   |
| CFC-PAC (ours)      | 96.37 $\pm$ 0.17 | 93.23 $\pm$ 0.47 | 1.00 $\pm$ 0.00   | 96.37 $\pm$ 0.17 | 93.23 $\pm$ 0.47 | 1.00 $\pm$ 0.00   | 96.37 $\pm$ 0.17 | 93.23 $\pm$ 0.47 | 1.00 $\pm$ 0.00   |
| CFC-PAC-FULL (ours) | 97.75 $\pm$ 0.19 | 95.62 $\pm$ 0.71 | 2.00 $\pm$ 0.00   | 97.64 $\pm$ 0.13 | 95.62 $\pm$ 0.71 | 1.86 $\pm$ 0.06   | 97.27 $\pm$ 0.21 | 95.21 $\pm$ 0.77 | 1.42 $\pm$ 0.07   |

Table 13. Flickr8k setting ablation at  $\alpha = 0.03$  (target coverage 97%). Each cell reports ECR/APSS/GSC for the corresponding method.

| Setting                            | CFC                  | CFC-PAC-FULL         |
|------------------------------------|----------------------|----------------------|
| $N = 2$ , max-loss, poly2          | 96.02 / 1.00 / 93.02 | 97.62 / 1.89 / 95.93 |
| Chosen: $N = 2$ , mean-loss, poly2 | 95.81 / 0.99 / 93.23 | 97.27 / 1.42 / 95.21 |
| $N = 3$ , mean-loss, poly2         | 96.00 / 1.00 / 93.02 | 97.81 / 2.16 / 96.35 |

**Setting ablation.** Table 13 compares the chosen Flickr8k setting against two nearby alternatives from the clean search at the representative target  $\alpha = 0.03$ . The chosen  $N = 2$  mean-loss quadratic rule is the best-balanced option we found: it keeps the **CFC** variant essentially at single-caption size, while **CFC-PAC-FULL** remains close to target without the larger APSS jump of the  $N = 3$  alternative.
